# Supplementary material for: ORCHIDEE-MICT-BIOENERGY: an attempt to represent the production of lignocellulosic crops for bioenergy in a global vegetation model
Source: Copernicus journal article supplement (doi:10.5194/gmd-11-2249-2018), 2018-06-15
Supplement: Supplementary file [file gmd-11-2249-2018-supplement-title-page.pdf › gmd-11-2249-2018-supplement-title-page.pdf]

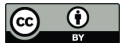

*Supplement of*

## **ORCHIDEE-MICT-BIOENERGY: an attempt to represent the production of lignocellulosic crops for bioenergy in a global vegetation model**

**Wei Li et al.**

*Correspondence to:* Wei Li ([wei.li@lsce.ipsl.fr](mailto:wei.li@lsce.ipsl.fr))

- [gmd-11-2249-2018-supplement-title-page.pdf](#)
- [SI\\_Figure\\_180501.pdf](#)
- [SI\\_Table\\_180501.xlsx](#)

The copyright of individual parts of the supplement might differ from the CC BY 4.0 License.
